# Supplementary material
Source: PubMed Central journal article supplement (PMC7965815)
Supplement: 3763_table.pdf [file 3763_table.pdf]

**On-line Table: Overview of initial ASPECTS, clinical, and angiographic data**

| Age (yr)/Sex | ASPECTS (Initial CT or DWI) | Initial NIHSS Score | Cervical ICA Stenosis (NASCET <sup>®</sup> , (%)) (100% = Occlusion) |                    | Intracranial Occlusion Site | Postintervention. TICI | Antiaggregation                  | Hemorrhage, PH 2 |                   | mRS after 90 Days |
|--------------|-----------------------------|---------------------|----------------------------------------------------------------------|--------------------|-----------------------------|------------------------|----------------------------------|------------------|-------------------|-------------------|
|              |                             |                     | Initial NIHSS Score                                                  | (100% = Occlusion) |                             |                        |                                  | PH 2             | mRS after 90 Days |                   |
| 1            | 49/F                        | 8                   | 7                                                                    | 68                 | Left M1/M2                  | 2b                     | Tirofiban                        | No               | No                | 3                 |
| 2            | 69/M                        | 9                   | 20                                                                   | 100                | Left carotid T, M1          | 2b                     | Aspirin/clopidogrel <sup>a</sup> | No               | No                | 4                 |
| 3            | 62/M                        | 8                   | 16                                                                   | 81                 | Right M1                    | 2a                     | Tirofiban                        | Yes              | Yes               | 5                 |
| 4            | 69/M                        | 7                   | 15                                                                   | 81                 | Left carotid T              | 2a                     | Tirofiban                        | Yes              | Yes               | 4                 |
| 5            | 75/M                        | 8                   | 22                                                                   | 100                | Right carotid T, M1/2/3     | 2a                     | Aspirin/clopidogrel              | Yes              | Yes               | 6                 |
| 6            | 69/M                        | 8                   | 12                                                                   | 77                 | Right M1                    | 3                      | Tirofiban                        | No               | No                | 1                 |
| 7            | 53/M                        | 9                   | 19                                                                   | 74                 | Left carotid T              | 3                      | Tirofiban                        | No               | No                | 2                 |
| 8            | 72/M                        | 8                   | 18                                                                   | 86                 | Left M1/2                   | 2a                     | Tirofiban                        | No               | No                | 3                 |
| 9            | 55/M                        | 10                  | 21                                                                   | 78                 | Left M1                     | 2a                     | Tirofiban                        | No               | No                | 1                 |
| 10           | 80/M                        | 9                   | 15                                                                   | 78                 | Right M1/2                  | 2b                     | Tirofiban                        | No               | No                | 3                 |
| 11           | 83/M                        | 9                   | 23                                                                   | 70                 | Right M1/2                  | 2b                     | Tirofiban                        | No               | No                | 5                 |
| 12           | 63/M                        | 7                   | 17                                                                   | 100                | Left M1                     | 3                      | Tirofiban                        | No               | No                | 4                 |
| 13           | 77/M                        | 9                   | Initial NIHSS 5, deteriorated to NIHSS 12                            | 76                 | Left M1                     | 3                      | Aspirin/clopidogrel              | No               | No                | 3                 |
| 14           | 78/M                        | 8                   | Initial NIHSS 4, deteriorated to NIHSS >10                           | 71                 | Left M1                     | 3                      | Aspirin/clopidogrel              | No               | No                | 5                 |
| 15           | 64/M                        | 10                  | 16                                                                   | 100                | Left M1                     | 3                      | Tirofiban                        | No               | No                | 2                 |
| 16           | 52/M                        | 8                   | 18                                                                   | 100                | Right carotid T/M1          | 2a                     | Tirofiban                        | Yes              | Yes               | 5                 |
| 17           | 81/M                        | 9                   | 19                                                                   | 100                | Left carotid T/M1           | 2a                     | Tirofiban                        | No               | No                | 2                 |
| 18           | 60/M                        | 10                  | 16                                                                   | 90                 | Left carotid T/M1           | 3                      | Aspirin/clopidogrel              | No               | No                | 2                 |
| 19           | 59/M                        | 9                   | 22                                                                   | 100                | Left carotid T/M1           | 3                      | Aspirin/clopidogrel              | No               | No                | 0                 |
| 20           | 57/M                        | 8                   | 19                                                                   | 100                | Right carotid T, M1/2       | 3                      | Tirofiban                        | No               | No                | 3                 |
| 21           | 64/F                        | 10                  | 24                                                                   | 100                | Left carotid T/M1           | 2a                     | Tirofiban                        | No               | No                | 6                 |
| 22           | 80/M                        | 7                   | 23                                                                   | 100                | Left carotid T/M1           | 3                      | Aspirin/clopidogrel <sup>a</sup> | No               | No                | 6                 |
| 23           | 66/M                        | 9                   | 26                                                                   | 100                | Left carotid T/M1           | 2a                     | Tirofiban                        | No               | No                | 6                 |
| 24           | 76/F                        | 8                   | 17                                                                   | 100                | Right carotid T/M1          | 3                      | Tirofiban                        | No               | No                | 3                 |

**Note:**—PH 2 indicates parenchymal hemorrhage according to ECASS-2. Postintervention., postinterventional; carotid T, carotid triangle.

<sup>a</sup> These patients were already undergoing treatment with aspirin and clopidogrel.
